# Supplementary material
Source: PubMed Central journal article supplement (PMC6849955)
Supplement: baADV2019000404-suppl1.pdf [file baADV2019000404-suppl1.pdf]

## Supplemental Figures and Tables for Shiba et al.

### Transcriptome Analysis Offers a Comprehensive Illustration of the Genetic Background of Pediatric Acute Myeloid Leukemia.

Table S1: Clinical characteristics of 443 patients with de novo AML enrolled in AML-05 trial.

Table S2: The genetic background of 139 pediatric de novo AML patients performed RNA-sequencing.

Table S3: The clinical features of de novo pediatric AML patients with adverse fusions.

Table S4: The clinical features of de novo pediatric AML patients without any driver alterations.

Table S5: The clinical features of de novo pediatric AML patients with *KMT2A* fusions.

Figure S1: Comparison of cytogenetic alterations between Children's Oncology Group (COG) and Japan Children's Pediatric Leukemia/Lymphoma Study Group (JPLSG).

Figure S2: Treatment scheme in the AML-05 clinical trial.

Figure S3: Clinical and genetic profiles of 70 patients with AML with a normal karyotype.

Figure S4: Clinical and genetic profiles of 84 patients with AML with high *PRDM16* gene expression.

**Table S1. Clinical characteristics of 443 patients with de novo AML enrolled in AML-05 trial.**

|                                                                                                                               |                | non-analyzed<br>(n = 74) | analyzed<br>(n = 369) | P value |
|-------------------------------------------------------------------------------------------------------------------------------|----------------|--------------------------|-----------------------|---------|
| Age at diagnosis                                                                                                              | Mean ± SD      | 5.2 ± 5.1                | 7.4 ± 5.1             | <0.001  |
|                                                                                                                               | Median (range) | 3 (0–15)                 | 7 (0–17)              |         |
| Gender male, n (%)                                                                                                            |                | 30 (41)                  | 175 (47)              | 0.31    |
| White cell count at diagnosis (x10 <sup>3</sup> /mm <sup>3</sup> )                                                            | Mean ± SD      | 19.7 ± 38.1              | 54.0 ± 91.0           | <0.001  |
|                                                                                                                               | Median (range) | 7.6 (1.0–247.6)          | 20.2 (0.6–985.0)      |         |
| Cytogenetic risk, n (%)                                                                                                       |                |                          |                       |         |
| Low risk                                                                                                                      |                | 15 (20)                  | 123 (33)              | 0.04¶   |
| Intermediate risk                                                                                                             |                | 42 (57)                  | 147 (40)              |         |
| High risk                                                                                                                     |                | 6 (8)                    | 50 (14)               |         |
| No complete remission                                                                                                         |                | 11 (15)                  | 49 (13)               |         |
| AML subtype (FAB classification), n (%)                                                                                       |                |                          |                       |         |
| M0                                                                                                                            |                | 1 (1)                    | 7 (2)                 | 1       |
| M1                                                                                                                            |                | 9 (12)                   | 48 (13)               | 1       |
| M2                                                                                                                            |                | 13 (17)                  | 104 (28)              | 0.06    |
| M3                                                                                                                            |                | 0 (0)                    | 1 (0.3)               | 1       |
| M4                                                                                                                            |                | 6 (8)                    | 56 (15)               | 0.14    |
| M5                                                                                                                            |                | 21 (2)                   | 73 (20)               | 0.12    |
| M6                                                                                                                            |                | 2 (3)                    | 8 (2)                 | 0.68    |
| M7                                                                                                                            |                | 15 (20)                  | 33 (9)                | 0.007   |
| RAEB                                                                                                                          |                | 2 (3)                    | 1 (0.3)               | 0.07    |
| RAEB-T                                                                                                                        |                | 5 (7)                    | 34 (9)                | 0.65    |
| Chromosomal abnormality or genetic mutation                                                                                   |                |                          |                       |         |
| Normal karyotype, n (%)                                                                                                       |                | 15 (20)                  | 70 (19)               | 0.75    |
| Complex karyotype, n (%)                                                                                                      |                | 13 (18)                  | 40 (11)               | 0.12    |
| <i>RUNX1-RUNX1T1</i>                                                                                                          |                | 16 (22)                  | 106 (29)              | 0.25    |
| <i>CBFB-MYH11</i>                                                                                                             |                | 1 (1)                    | 31 (8)                | 0.03    |
| <i>KMT2A</i> rearrangement                                                                                                    |                | 16 (22)                  | 55 (15)               | 0.17    |
| Mortality, n (%)                                                                                                              |                | 18 (24)                  | 56 (20)               | 0.84#   |
| AML, acute myelogenous leukemia; SD, standard deviation.                                                                      |                |                          |                       |         |
| P values were calculated using the Mann–Whitney U test for continuous values, and Fisher’s exact test for categorical values. |                |                          |                       |         |
| ¶ P values were calculated using the Cochrane-Armitage test.                                                                  |                |                          |                       |         |
| # P value was calculated using Log-rank test.                                                                                 |                |                          |                       |         |

**Table S2. The genetic background of 139 pediatric de novo AML patients performed RNA-sequencing.**

|                             | examined | Not examined |
|-----------------------------|----------|--------------|
| Total                       | 139      | 230          |
| normal karyotype            | 60       | 10           |
| monosomy7                   | 3        | 5            |
| trisomy8                    | 18       | 10           |
| <i>RUNX1-RUNX1T1</i>        | 0        | 106          |
| <i>CBFB-MYH11</i>           | 0        | 31           |
| <i>NUP98-NSD1</i>           | 7        | 4            |
| <i>FUS-ERG</i>              | 3        | 2            |
| <i>DEK-NUP214</i>           | 2        | 2            |
| <i>CEBPA</i> double         | 21       | 2            |
| <i>NPM1</i>                 | 16       | 2            |
| <i>FLT3</i> -ITD            | 33       | 14           |
| <i>KMT2A</i> -PTD           | 12       | 1            |
| <i>CBFA2T3-GLIS2</i>        | 3        | 8            |
| <i>KMT2A</i> -rearrangement | 14       | 47           |
| <i>NUP98-KDM5A</i>          | 3        | 3            |
| <i>PRDM16</i> high          | 65       | 19           |
| <i>MECOM</i> high           | 21       | 36           |
| FAB-M7                      | 9        | 25           |

**Table S3. The clinical features of de novo pediatric AML patients with adverse fusions.**

| RNA No. | Fusions       | sex | risk   | Age (y) | FAB    | chromosome                                                                                                                               | FLT3-ITD | PRDM16 high | MECOM high | relapse | outcome |
|---------|---------------|-----|--------|---------|--------|------------------------------------------------------------------------------------------------------------------------------------------|----------|-------------|------------|---------|---------|
| 147     | FUS-ERG       | F   | HR     | 9.3     | M1     | 47,XX,+8[12]/46,XX[8]                                                                                                                    | -        | +           | -          | +       | Dead    |
| 438     | FUS-ERG       | F   | HR     | 13.6    | M2     | 49,XX,+8,+10,+12[20]                                                                                                                     | -        | +           | -          | +       | Dead    |
| 234     | FUS-ERG       | M   | HR     | 2.8     | M5a    | 49,XY,+10,t(16;21)(p11.2;q22),+21,+22[19]/50,XY,+10,+13,t(16;21)(p11.2;q22),+21,+22[1]                                                   | -        | -           | -          | +       | Dead    |
| 310     | FUS-ERG       | F   | HR     | 14.5    | M5a    | 46,XX,t(16;21)(p11.2;q22)[20]                                                                                                            | -        | -           | -          | -       | Dead    |
| 398     | FUS-ERG       | M   | HR     | 4.7     | M2     | 46,XY,t(2;11)(p21;p15),t(16;21)(p11.2;q22)[13]/46,XY[7]                                                                                  | -        | +           | -          | +       | Dead    |
| 115     | RPN1-MECOM    | F   | non-CR | 14.6    | M5a    | 45,XX,inv(3)(q21q26),-7[16]/46,XX[4]                                                                                                     | -        | +           | +          | -       | Dead    |
| 229     | RPN1-MECOM    | F   | non-CR | 14.9    | RAEB-T | 45,XX,inv(3)(q21q26.2),-7[20]                                                                                                            | -        | -           | +          | +       | Dead    |
| 133     | DEK-NUP214    | M   | IR     | 14.7    | M2     | 46,XY,t(6;9)(p23;q34)[20]                                                                                                                | -        | +           | -          | +       | Alive   |
| 280     | DEK-NUP214    | M   | IR     | 11.2    | M2     | 46,Y,der(X)add(X)(p11.2)add(X)(q22),t(6;9)(q15;p24)[20]                                                                                  | -        | -           | -          | +       | Dead    |
| 210     | DEK-NUP214    | M   | non-CR | 6.8     | M5a    | 48,XY,der(4)t(4;6)(q21;p21)t(6;9)(p23;q34),der(6)t(4;6),+8,der(9)t(6;9),+13[1]/49,sl,+13[18]                                             | +        | +           | -          | -       | Dead    |
| 420     | DEK-NUP214    | M   | non-CR | 6.1     | M4     | 46,XY,t(6;9)(p23;q34)[19]/46,idem,add(20)(q11.2)[1]                                                                                      | +        | +           | -          | +       | Dead    |
| 148     | KMT2A-AFDN    | M   | IR     | 8.6     | M1     | 47,XY,t(6;11)(q27;q23),+8[19]                                                                                                            | -        | +           | -          | +       | Dead    |
| 378     | KMT2A-AFDN    | M   | IR     | 0.2     | M5a    | 46,XY,t(6;11)(q27;q23)[3]/46,XY[17]                                                                                                      | -        | -           | -          | +       | Alive   |
| 240     | KMT2A-AFDN    | F   | IR     | 2.9     | M4     | 46,XX,t(6;11)(q27;q23)[20]                                                                                                               | -        | -           | +          | +       | Dead    |
| 297     | KMT2A-AFDN    | F   | IR     | 10.8    | M5a    | 46,XX,t(6;11)(p21;q23)[25]                                                                                                               | -        | -           | -          | +       | Dead    |
| 232     | NUP98-KDM5A   | F   | IR     | 1.7     | M6a    | 46,XX[20]                                                                                                                                | -        | +           | +          | +       | Dead    |
| 413     | NUP98-KDM5A   | M   | IR     | 1.3     | RAEB-T | 46,XY,del(13)(q7)[12]/46,XY[8]                                                                                                           | -        | +           | +          | +       | Alive   |
| 353     | NUP98-KDM5A   | F   | IR     | 14.3    | M5a    | 48,XX,+6,+7[12]/48,idem,i(18)(q10)[7]/49,idem,+8,i(18)[1]                                                                                | -        | -           | +          | +       | Dead    |
| 336     | NUP98-KDM5A   | F   | IR     | 1.1     | M7     | 45,XX,-15,add(18)(q21),add(19)(p13)[16]/46,sl,del(13)(q7)[2]/46,XX[2]                                                                    | -        | +           | +          | +       | Dead    |
| 368     | NUP98-KDM5A   | F   | IR     | 1.2     | M7     | 46,XX,add(6)(q23),der(8;15)(q10;q10),+mar[7]/46,XX,add(6)(q23),der(8;15)(q10;q10),del(13)(q12q14),+mar[4]/46,XX,add(11)(q13)[3]/46,XX[5] | -        | -           | +          | -       | Alive   |
| 405     | NUP98-KDM5A   | M   | non-CR | 2.2     | M7     | 46,XY,del(3)(q13.2),add(6)(p25),ins(11;7)(q13;7),ins(12;7)(q13;7),del(13)(q12q14)[10]/49,idem,+2,+9,del(13)(q12q14),-17,+21[1]/46,XY[9]  | -        | +           | +          | -       | Alive   |
| 98      | NUP98-NSD1    | M   | HR     | 16.8    | M4     | 47,XY,+8[12]/46,XY[8]                                                                                                                    | +        | +           | -          | +       | Dead    |
| 222     | NUP98-NSD1    | F   | non-CR | 11.2    | M4     | 46,XX[20]                                                                                                                                | +        | +           | -          | -       | Dead    |
| 225     | NUP98-NSD1    | M   | non-CR | 17.3    | M5a    | 47,XY,+6[19]/48,XY,+6,+17[1]                                                                                                             | +        | +           | -          | +       | Dead    |
| 111     | NUP98-NSD1    | M   | IR     | 5.6     | M1     | 46,XY,del(9)(q7)[20]                                                                                                                     | -        | +           | -          | +       | Dead    |
| 117     | NUP98-NSD1    | M   | non-CR | 13.1    | M5a    | 46,XY[20]                                                                                                                                | -        | +           | -          | +       | Dead    |
| 37      | NUP98-NSD1    | M   | HR     | 13.8    | M0     | 47,XY,+8[20]                                                                                                                             | +        | +           | -          | -       | Alive   |
| 395     | NUP98-NSD1    | M   | non-CR | 14.8    | M5a    | 47,XY,+8[2]/47,idem,add(10)(q11.2),add(10)(q22),add(12)(q24.1)[1]/46,XY[16]                                                              | +        | +           | -          | +       | Dead    |
| 285     | NUP98-NSD1    | F   | non-CR | 12.3    | M5b    | 46,XX[20]                                                                                                                                | -        | +           | -          | -       | Alive   |
| 128     | NUP98-NSD1    | M   | HR     | 10.8    | M2     | 46,XY[20]                                                                                                                                | +        | +           | -          | +       | Dead    |
| 385     | NUP98-NSD1    | M   | non-CR | 6       | M5a    | 46,XY[20]                                                                                                                                | +        | +           | -          | +       | Dead    |
| 397     | NUP98-NSD1    | M   | non-CR | 13.4    | M5a    | 47,XY,+8[17]/46,XY[3]                                                                                                                    | +        | +           | -          | +       | Dead    |
| 81      | CBFA2T3-GLIS2 | M   | non-CR | 0.8     | M7     | 47,XY,+21[9]/46,XY[11]                                                                                                                   | -        | -           | -          | +       | Dead    |
| 116     | CBFA2T3-GLIS2 | M   | HR     | 1.3     | M7     | 46,XY[20]                                                                                                                                | +        | -           | -          | +       | Dead    |
| 119     | CBFA2T3-GLIS2 | F   | HR     | 1.9     | M7     | 47,XX,+3[11]/46,XX[9]                                                                                                                    | +        | -           | -          | +       | Alive   |
| 144     | CBFA2T3-GLIS2 | M   | IR     | 1.2     | M7     | 46,XY,t(15;16)(q24;q24)[1]/47,XY,+Y[1]/46,XY[18]                                                                                         | -        | -           | -          | +       | Dead    |
| 159     | CBFA2T3-GLIS2 | M   | IR     | 0.3     | M7     | 46,XY[20]                                                                                                                                | -        | -           | -          | +       | Dead    |
| 192     | CBFA2T3-GLIS2 | F   | IR     | 0.8     | M7     | 48,XX,+3,+21[9]/46,XX[11]                                                                                                                | -        | -           | -          | +       | Alive   |
| 282     | CBFA2T3-GLIS2 | M   | IR     | 0.8     | M7     | 49,XY,+Y,+12,+21[2]/50,sl,+Y,+8,-12[18]                                                                                                  | -        | -           | -          | +       | Dead    |
| 315     | CBFA2T3-GLIS2 | M   | IR     | 1.2     | M7     | 48,XY,+14,+21[20]                                                                                                                        | -        | -           | -          | -       | Alive   |
| 352     | CBFA2T3-GLIS2 | M   | non-CR | 0.9     | M7     | 46,XY[20]                                                                                                                                | -        | -           | -          | +       | Alive   |
| 429     | CBFA2T3-GLIS2 | F   | IR     | 0.8     | M7     | 48,XX,t(3;21)(q27;q22),+21,+21[11]/48,idem,der(19)t(1;19)(q21;p13)[3]/90,idemx2,-4,-7,-9,-15,-18,-21[3]/46,XX[3]                         | -        | -           | -          | +       | Dead    |

| Table S4. The clinical features of 29 patients with de novo AML without any gene alterations other than FAB M7. |     |         |        |        |                                                                                                                                                                                                                            |                |         |       |         |  |
|-----------------------------------------------------------------------------------------------------------------|-----|---------|--------|--------|----------------------------------------------------------------------------------------------------------------------------------------------------------------------------------------------------------------------------|----------------|---------|-------|---------|--|
| RNA No.                                                                                                         | Sex | Age (y) | Risk   | FAB    | Chromosome                                                                                                                                                                                                                 | Gene mutations | Relapse | Event | Outcome |  |
| 248                                                                                                             | M   | 4.8     | non-CR | M4     | 46,XY,add(7)(q32),del(9)(q?),ins(12;?)q(13;?)20                                                                                                                                                                            | <i>KIT</i>     | -       | +     | Dead    |  |
| 256                                                                                                             | M   | 14.1    | IR     | M1     | 46,XY,t(1;14)(p36.1;q32)[1]/46,XY[19]                                                                                                                                                                                      | <i>KIT</i>     | -       | +     | Dead    |  |
| 265                                                                                                             | M   | 15.8    | non-CR | M2     | 46,XY,t(11;20)(p11.2;p11.2)[17]/46,XY[3]                                                                                                                                                                                   | -              | +       | +     | Dead    |  |
| 294                                                                                                             | F   | 13.8    | HR     | M2     | 45,X,-X,add(2)(q31),add(5)(q22),add(7)(p11.2),del(9)(q?),add(12)(p11.2),add(12)(p11.2),del(16)(p?)1/45,sl,del(13)(q?)15/45,sdl1, - add(7),+add(7)(p11.2)2/46,XX[1]                                                         | -              | +       | +     | Dead    |  |
| 16                                                                                                              | M   | 7.8     | HR     | RAEB-T | 46,XY[20]                                                                                                                                                                                                                  | -              | +       | +     | Dead    |  |
| 130                                                                                                             | F   | 11      | IR     | M5a    | 46,XX,t(11;11)(p15;q22)[4]/46,idem,add(17)(p11.2)2/46,XX[14]                                                                                                                                                               | -              | +       | +     | Dead    |  |
| 251                                                                                                             | F   | 2.3     | IR     | RAEB-T | 46,XX,add(1)(p13),add(3)(q21),del(3)(q21),del(13)(q?)1/46,XX[19]                                                                                                                                                           | -              | +       | +     | Dead    |  |
| 415                                                                                                             | F   | 12.3    | IR     | M6a    | 45,XX,ins(1;?)q(21;?), add(4)(q12), add(7)(q36),der(17;18)(q10;q10)[20]                                                                                                                                                    | -              | +       | +     | Dead    |  |
| 105                                                                                                             | M   | 10.8    | IR     | M4     | 46,XY,+Y,add(1)(p11),del(2)(q?),del(5)(q?),add(8)(p11.2),-9,-9,-11,-17,add(18)(q21),-19,add(22)(q11.2),+del(?)t(?)11(?)q13,+mar1,+mar2,+mar3[2]/88,sl,x2,-3,-del(5)x2,-6,+9,-20,-20,-21,-mar1,-mar3x2,+5mar[1]/47,XY,+Y[9] | -              | +       | +     | Dead    |  |
| 314                                                                                                             | M   | 1.3     | IR     | M4     | 46,XY,add(6)(q11),add(7)(p11.2),add(9)(p13),del(12)(p?)16/46,sl,del(5)(q?),-add(7),+der(7)add(7)t(5;7)(q13;q22)[4]                                                                                                         | -              | +       | +     | Dead    |  |
| 228                                                                                                             | F   | 0.3     | non-CR | M5a    | 46,XX,add(1)(q42),del(1)(q23q25),add(3)(p25),del(7)(q11.2)[7]/47,sl,+19[3]/47,sdl1,der(3)add(3)(p13)del(3)(q24q25),add(5)(q13)[10]                                                                                         | -              | -       | +     | Dead    |  |
| 279                                                                                                             | F   | 12.1    | IR     | M1     | 46,XX[20]                                                                                                                                                                                                                  | -              | -       | +     | Dead    |  |
| 412                                                                                                             | F   | 11.8    | IR     | M2     | 46,XX,inv(9)(p12q13)[20]                                                                                                                                                                                                   | <i>WT1</i>     | -       | -     | Alive   |  |
| 396                                                                                                             | F   | 7.6     | IR     | M1     | 46,XX[20]                                                                                                                                                                                                                  | <i>WT1</i>     | -       | -     | Alive   |  |
| 180                                                                                                             | F   | 0.5     | HR     | M2     | 48,XX,t(7;12)(q36;p13),+8,+19[8]/47,sl,-20,add(22)(p11.2)[12]                                                                                                                                                              | <i>KIT</i>     | +       | +     | Alive   |  |
| 430                                                                                                             | F   | 11      | IR     | M1     | 46,XX[20]                                                                                                                                                                                                                  | <i>KIT</i>     | +       | +     | Alive   |  |
| 359                                                                                                             | F   | 13.9    | IR     | M2     | 46,XX[20]                                                                                                                                                                                                                  | <i>KIT</i>     | -       | -     | Alive   |  |
| 135                                                                                                             | M   | 11.3    | IR     | M4     | 48,XY,+8,+8[20]                                                                                                                                                                                                            | <i>KIT</i>     | -       | -     | Alive   |  |
| 127                                                                                                             | F   | 0.4     | HR     | M5a    | 47,XX,t(7;12)(q36;p13),+19[20]                                                                                                                                                                                             | -              | +       | +     | Alive   |  |
| 393                                                                                                             | F   | 13.3    | IR     | M1     | 46,XX,?t(5;6)(p15;q24)[6]/47,idem,+mar,inc[10]                                                                                                                                                                             | -              | +       | +     | Alive   |  |
| 277                                                                                                             | M   | 15.1    | IR     | M5a    | 46,XY[20]                                                                                                                                                                                                                  | -              | +       | +     | Alive   |  |
| 278                                                                                                             | M   | 5.8     | IR     | M5a    | 46,XY,t(1;3)(p32;p25),t(12;12)(p13;q13)[18]/46,XY[2]                                                                                                                                                                       | -              | +       | +     | Alive   |  |
| 379                                                                                                             | M   | 1.6     | non-CR | M6     | 46,XY,-7[20]                                                                                                                                                                                                               | -              | -       | +     | Alive   |  |
| 21                                                                                                              | F   | 14.9    | HR     | M6a    | 46,XX[20]                                                                                                                                                                                                                  | -              | -       | -     | Alive   |  |
| 118                                                                                                             | F   | 14.6    | IR     | M2     | 46,XX[20]                                                                                                                                                                                                                  | -              | -       | -     | Alive   |  |
| 41                                                                                                              | F   | 4.1     | IR     | M2     | 47,XX,+21[4]/48,XX,+4,+21[2]/46,XX,i(21)(q10)[1]/46,XX[13]                                                                                                                                                                 | -              | -       | -     | Alive   |  |
| 94                                                                                                              | M   | 1.1     | IR     | M5a    | 47,Y,add(X)(q22),add(1)(q21),add(5)(q11),der(7)add(7)(p11)add(7)(q22),add(13)(q32),+19[4]/46,XY[3]                                                                                                                         | -              | -       | -     | Alive   |  |
| 46                                                                                                              | M   | 1.1     | IR     | M2     | 47,XY,der(18)t(1;18)(q25;p11.2),+(21)(q10)[19]/46,XY[1]                                                                                                                                                                    | -              | -       | -     | Alive   |  |
| 367                                                                                                             | M   | 7       | IR     | M0     | 47,XY,+11[18]/54,idem,+x,+10,+11,+13,+14,+20,+21[1]/46,XY[1]                                                                                                                                                               | -              | -       | -     | Alive   |  |

| Table S5. The clinical features of de novo pediatric AML patients with <i>KMT2A</i> fusions. |                            |     |        |         |        |                                                                                                          |             |            |         |       |                 |
|----------------------------------------------------------------------------------------------|----------------------------|-----|--------|---------|--------|----------------------------------------------------------------------------------------------------------|-------------|------------|---------|-------|-----------------|
| RNA No.                                                                                      |                            | sex | Risks  | Age (y) | FAB    | Chromosome                                                                                               | PRDM16 high | MECOM high | relapse | Dead  | Cause of death  |
| 157                                                                                          | <i>KMT2A-ELL</i>           | F   | Non-CR | 0.6     | M5a    | 46,XX[20]                                                                                                | +           | -          | -       | Dead  | ARDS            |
| 86                                                                                           | <i>KMT2A-ELL</i>           | M   | Non-CR | 0.6     | M4     | 47,XY,+8,i(10)(q10),t(11;19)(q23;p13.1)[18]/46,XY[2]                                                     | -           | -          | -       | Dead  | ARDS            |
| 122                                                                                          | <i>KMT2A-ELL</i>           | F   | Non-CR | 0.6     | M5a    | 48,XX,+8,+18,-19,+20[19]                                                                                 | -           | -          | -       | Dead  | Primary disease |
| 417                                                                                          | <i>KMT2A-ELL</i>           | M   | IR     | 5.6     | M1     | 46,XY,t(11;19)(q23;p13.1)[17]/47,idem,+8[1]/46,XY[2]                                                     | -           | +          | +       | Alive | -               |
| 113                                                                                          | <i>KMT2A-ELL</i>           | F   | IR     | 10.3    | M2     | 46,XX,add(12)(p11)[12]/46,XX[8]                                                                          | -           | +          | +       | Alive | -               |
| 204                                                                                          | <i>KMT2A-ELL</i>           | M   | IR     | 11.7    | M1     | 47,XY,+22[1]/45,XYadd(2)(q31),-5,-7,-9,-14,-15,-19,+5mar[1]/46,XY[18]                                    | -           | -          | -       | Alive | -               |
| 304                                                                                          | <i>KMT2A-ELL</i>           | M   | IR     | 0.8     | ND     | 46,XY,t(11;19)(q23;p13.1)[19]/46,XY[1]                                                                   | -           | -          | -       | Alive | -               |
| 150                                                                                          | <i>KMT2A-MLLT1</i>         | M   | IR     | 13.7    | M5a    | 48,XY,+8,+8,t(11;19)(q23;p13.3)[12]/46,XY                                                                | -           | -          | +       | Alive | -               |
| 10                                                                                           | <i>KMT2A-MLLT1</i>         | F   | IR     | 14.5    | M0     | 46,XX,t(11;19)(q23;p13.3)[19]/46,sl.dup(1)(q21q32)[1]                                                    | -           | +          | -       | Alive | -               |
| 70                                                                                           | <i>KMT2A-MLLT1</i>         | M   | IR     | 4.9     | M5a    | 46,XY,t(11;19)(q23;p13.3)[13]/46,sl,t(1;6)(p22;q13)[4]/46,XY[2]                                          | +           | -          | +       | Dead  | -               |
| 439                                                                                          | <i>KMT2A-MLLT1</i>         | F   | IR     | 8.9     | M4     | 46,XX,t(11;19)(q23;p13.1)[20]                                                                            | -           | +          | +       | Alive | -               |
| 374                                                                                          | <i>KMT2A-MLLT1</i>         | F   | IR     | 1.8     | M5a    | 45,XX,add(8)(p11.2),t(11;19)(q23;p13.3),der(12;19)(q10;p10)[19]/46,XX[1]                                 | -           | -          | -       | Alive | -               |
| 188                                                                                          | <i>KMT2A-MLLT10</i>        | F   | IR     | 5.8     | M5a    | 46,XX[20]                                                                                                | +           | +          | +       | Dead  | Primary disease |
| 155                                                                                          | <i>KMT2A-MLLT10</i>        | M   | IR     | 0.8     | RAEB-T | 48,XY,add(11)(q13),+21,+21[4]/46,XY[16]                                                                  | -           | +          | +       | Dead  | Primary disease |
| 259                                                                                          | <i>KMT2A-MLLT10</i>        | M   | IR     | 10.6    | M5a    | 46,XY[20]                                                                                                | -           | -          | +       | Dead  | Primary disease |
| 202                                                                                          | <i>KMT2A-MLLT10</i>        | F   | IR     | 1       | M5a    | 46,XX,der(10)t(10;11)(p12;q14)del(11)(q23),der(11)t(10;11)[16]/46,XX[4]                                  | -           | -          | +       | Dead  | ARDS, GVHD      |
| 201                                                                                          | <i>KMT2A-MLLT10</i>        | F   | IR     | 1.8     | M5b    | 46,XX,t(8;10)(q13;p15),add(11)(q23)[17]/46,XX[3]                                                         | +           | +          | +       | Alive | -               |
| 356                                                                                          | <i>KMT2A-MLLT10</i>        | F   | IR     | 13.4    | M4     | 45,XX,der(1;19)(q10;p10),-9,+19[18]/46,XX[2]                                                             | +           | +          | -       | Alive | -               |
| 411                                                                                          | <i>KMT2A-MLLT10</i>        | F   | IR     | 5.6     | M5a    | 46,XX,ins(10;11)(p12;q13q23)[20]                                                                         | +           | -          | -       | Alive | -               |
| 214                                                                                          | <i>KMT2A-MLLT10</i>        | F   | IR     | 4       | M5a    | 46,XX,add(10)(p11.2)[16]/46,XX[4]                                                                        | -           | -          | -       | Alive | -               |
| 219                                                                                          | <i>KMT2A-MLLT10</i>        | F   | IR     | 1.1     | M5a    | 46,XX,add(7)(q22),der(10;11)(q10;q10)add(11)(q23),+mar1[17]/46,XX[3]                                     | -           | -          | -       | Alive | -               |
| 298                                                                                          | <i>KMT2A-PICALM</i>        | F   | IR     | 1.8     | M4     | 47,XX,+8,del(11)(q21q23)[18]/46,XX[2]                                                                    | -           | -          | -       | Alive | -               |
| 441                                                                                          | <i>KMT2A-LASP1</i>         | F   | IR     | 0.9     | M4     | 46,XX,t(11;17)(q23;q21)[15]/47,idem,+8[1]/46,XX[4]                                                       | -           | -          | -       | Alive | -               |
| 347                                                                                          | <i>KMT2A-SEPT6</i>         | F   | IR     | 2.3     | M4     | 46,XX[20]                                                                                                | -           | -          | -       | Alive | -               |
| 437                                                                                          | <i>KMT2A-R<sup>#</sup></i> | F   | IR     | 0.6     | M5b    | 46,XX,der(4)(4pter→4q33::11q21→11q23::19p13→19pter),der(11)t(4;11)(q33;q21),der(19)t(11;19)(q23;p13)[20] | -           | -          | -       | Alive | -               |
| 51                                                                                           | <i>KMT2A-R<sup>#</sup></i> | F   | IR     | 0       | M5a    | 46,XX,-10,add(11)(q23),+mar1[16]/46,XX[4]                                                                | -           | -          | -       | Alive | -               |
| 376                                                                                          | <i>KMT2A-R<sup>#</sup></i> | F   | Non-CR | 7.8     | M4     | 46,X,add(X)(q22),del(11)(q23),add(14)(q11.2)[7]/45,idem,-X[13]                                           | -           | -          | -       | Alive | -               |

\**KMT2A-MLLT3* and *KMT2A-AFDN* were excluded from this table. *KMT2A-R<sup>#</sup>* were identified by FISH analysis. ARDS, acute respiratory distress syndrome; GVHD, graft versus host disease.

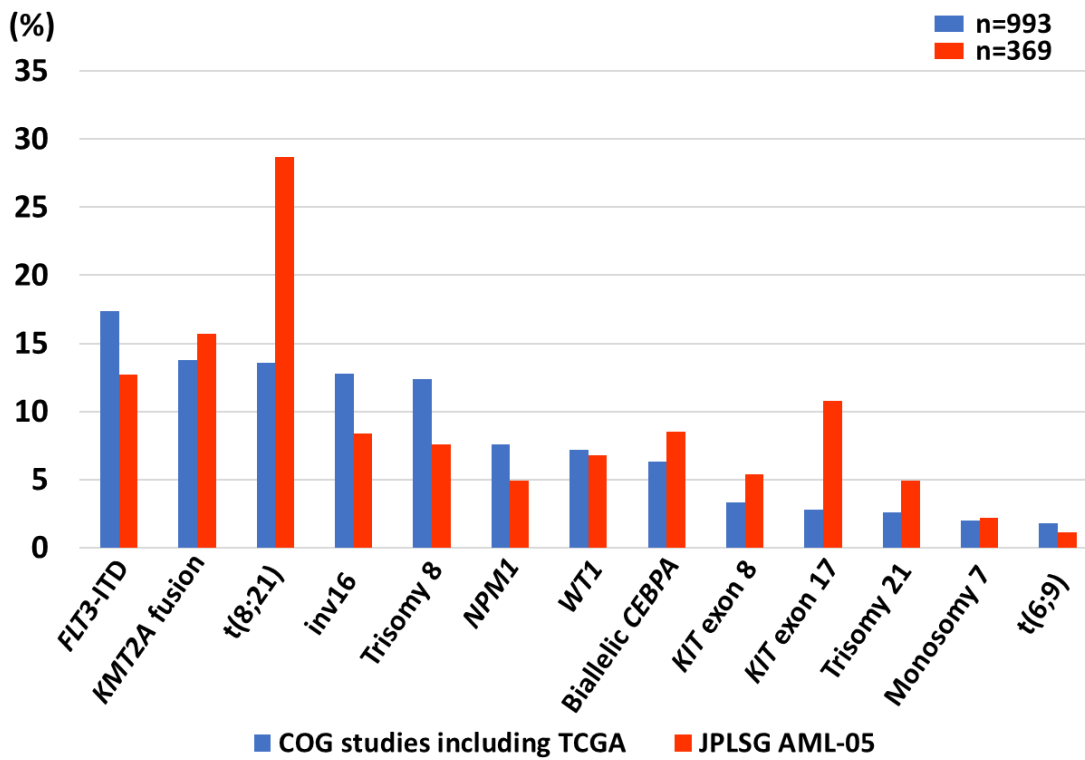

**Figure S1. Comparison of cytogenetic alterations between Children’s Oncology Group (COG) and Japan Pediatric Leukemia/Lymphoma Study Group (JPLSG).** Frequencies of the clinically established molecular aberrations of COG data included TCGA AML patients (n=993 patients) have been reported previously reported.\*

\*Bolouri H, Farrar JE, Triche T Jr, et al. The molecular landscape of pediatric acute myeloid leukemia reveals recurrent structural alterations and age-specific mutational interactions. *Nat Med.* 2018;24(1):103–112.

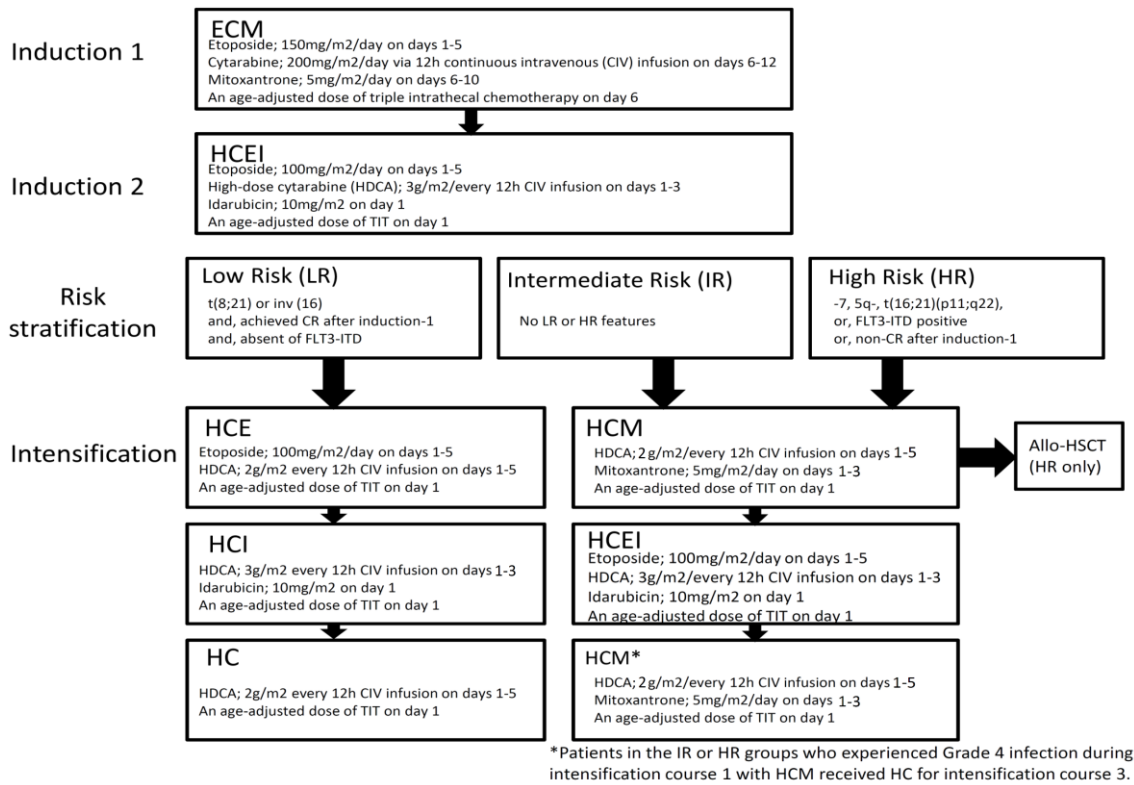

**Figure S2. Treatment scheme in the AML-05 clinical trial.** Patients who failed to achieve hematological complete remission (CR) after the second course were identified as non-CR and disengaged from the trial, and they had to select any other treatment regimens themselves but were eligible for this survey. Allogeneic hematopoietic stem cell transplantation (HSCT) was indicated in all high-risk (HR) patients after three or more treatment courses. All patients with the *FLT3*-ITD alteration underwent HSCT irrespective of the *FLT3*-ITD allelic ratio (AR). Asterisks indicate patients in the intermediate-risk or HR groups who experienced Grade 4 infection during intensification course 1 with HCM and received HC for intensification course 3. Ind-1, induction course 1; Ind-2, induction course 2; Allo-HSCT, allogeneic hematopoietic stem cell transplantation.



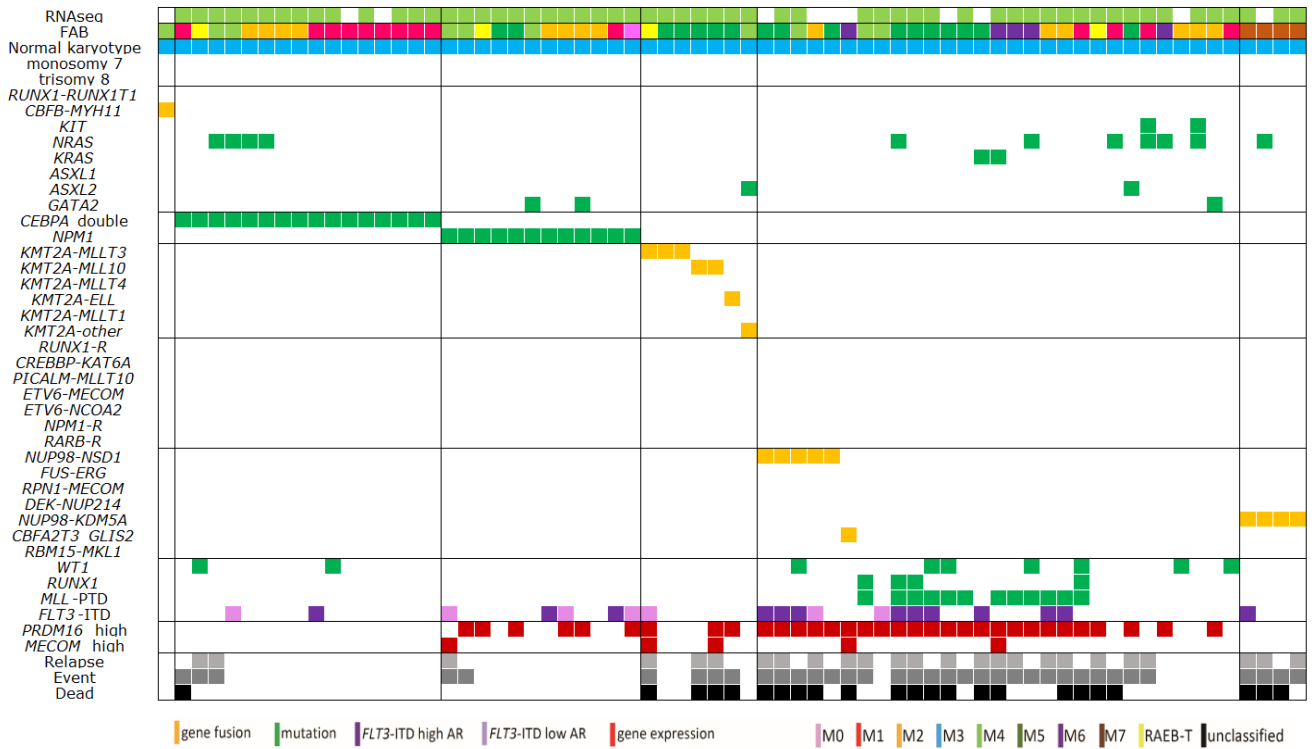

**Figure S3: Clinical and genetic profiles of 70 patients with AML with a normal karyotype. Each column indicates one patient.**

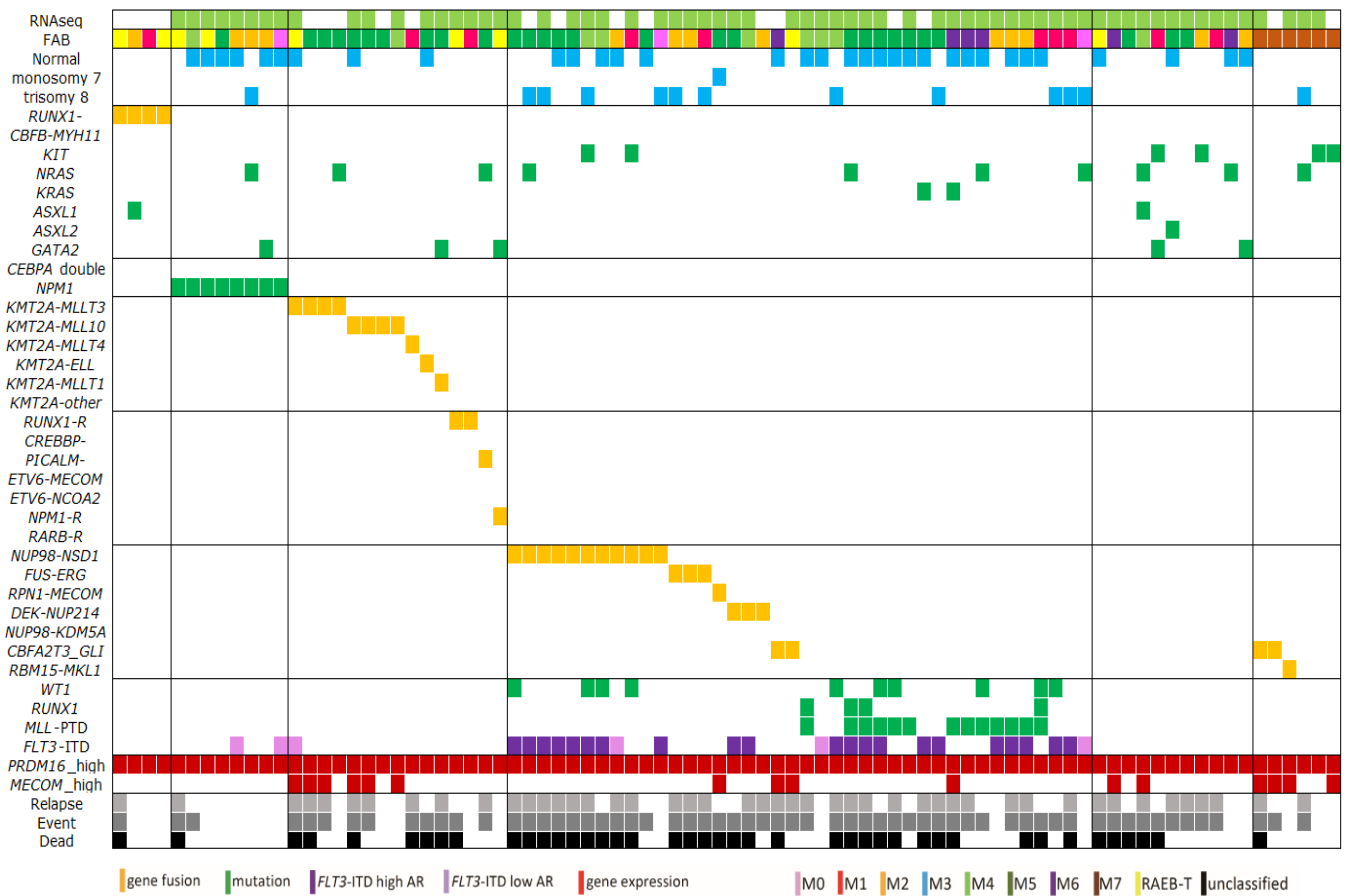

**Figure S4: Clinical and genetic profiles of 84 patients with AML with high *PRDM16* gene expression. Each column indicates one patient.**
